# Supplementary material for: Spatial and temporal differentiation of air quality and its influence factors in 16 cities in Shandong Province from 2019 to 2020
Source: Royal Society of Chemistry journal article supplement (doi:10.1039/d4su00128a), 2024-01-01
Supplement: d4su00128a1.pdf [file d4su00128a1.pdf]

### Supporting Information for

#### Spatial and temporal differentiation of air quality and its influence factors in 16 cities in

#### Shandong Province in 2019-2020

Ziheng Wan,<sup>a</sup> Chuanxi Yang,<sup>a\*</sup> Xiaoning Wang,<sup>a\*</sup> Yan Xue,<sup>b</sup> Jianai Zhao,<sup>c</sup> Jiayi Cui,<sup>b</sup> Qianqian Guo,<sup>b</sup> HuiJuan Hua,<sup>a</sup> Haofen Sun,<sup>a</sup> Dong Chen,<sup>a</sup> Weihua Zhao,<sup>a</sup> Yihua Xiao,<sup>a</sup> Weiliang Wang,<sup>a\*</sup>

<sup>a</sup>*School of Environmental and Municipal Engineering, Qingdao University of Technology, Qingdao 266520, China;*

<sup>b</sup>*School of Management Engineering, Qingdao University of Technology, Qingdao 266520, China*

<sup>c</sup>*Shandong Provincial Eco-environment Monitoring Center, Jinan 250101 266520, China*

\* Corresponding author:

E-mail: [yangchuanxi1989@hotmail.com](mailto:yangchuanxi1989@hotmail.com); Fax: +86-0532-8507-1262 (Chuanxi Yang)

E-mail: [wangxn5593@163.com](mailto:wangxn5593@163.com); Fax: +86-0532-8507-1262 (Chuanxi Yang)

E-mail: [sdqcsdnu@163.com](mailto:sdqcsdnu@163.com); Fax: +86-0532-8507-1262 (Weiliang Wang)

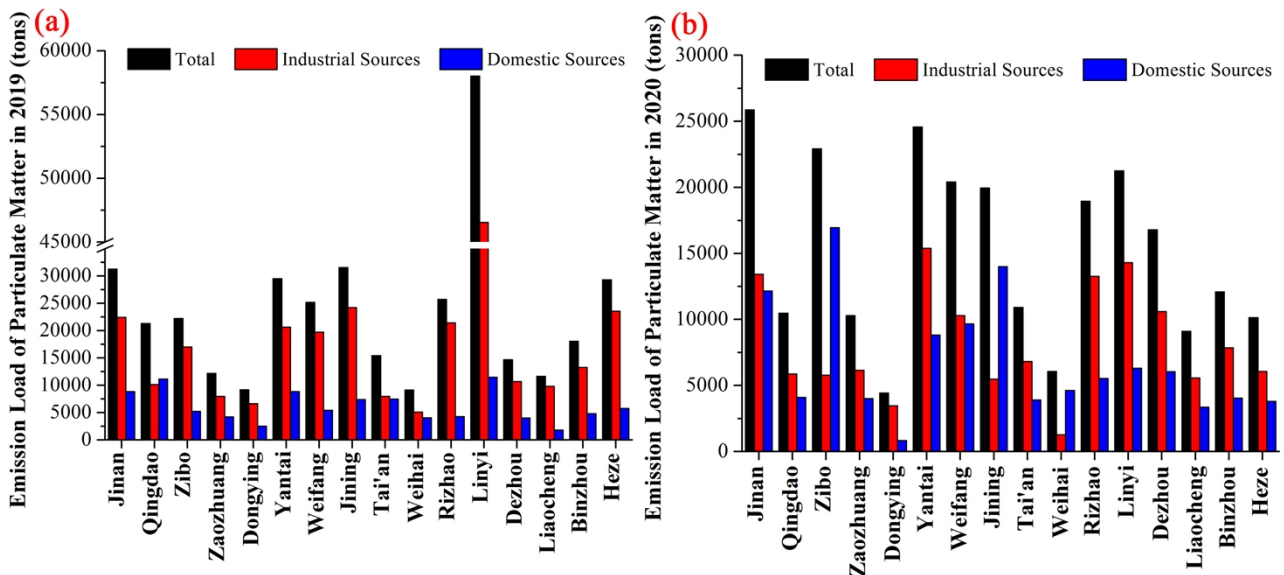

Fig. S1 Emission load of particulate matter in Shandong Province in 2019 (a) and 2020 (b)

The emission of particulate matter in different years and cities varies greatly. In 2019, the total emission of particulate matter in Linyi was the largest, among which the emissions of particulate matter from industrial sources and domestic sources reached 46,532 tons and 11,480 tons, respectively. Weihai had the smallest particulate matter emissions, with industrial and domestic sources emitting 5,082 tons and 4,034 tons, respectively. Fifteen cities were dominated by emissions from industrial sources, while only Qingdao was dominated by emissions from domestic sources. However, in 2020, the total emission of particulate matter in Jinan was the largest, among which the emissions of particulate matter from industrial sources and domestic sources reached 13,414 tons and 12,147 tons, respectively. Dongying had the smallest particulate matter emissions, with industrial and domestic sources emitting 3,470 tons and 822 tons, respectively. Thirteen cities, including Yantai, Linyi and Rizhao, were dominated by emissions from industrial sources, while three cities, Zibo, Jining and Weihai, were dominated by emissions from domestic sources.

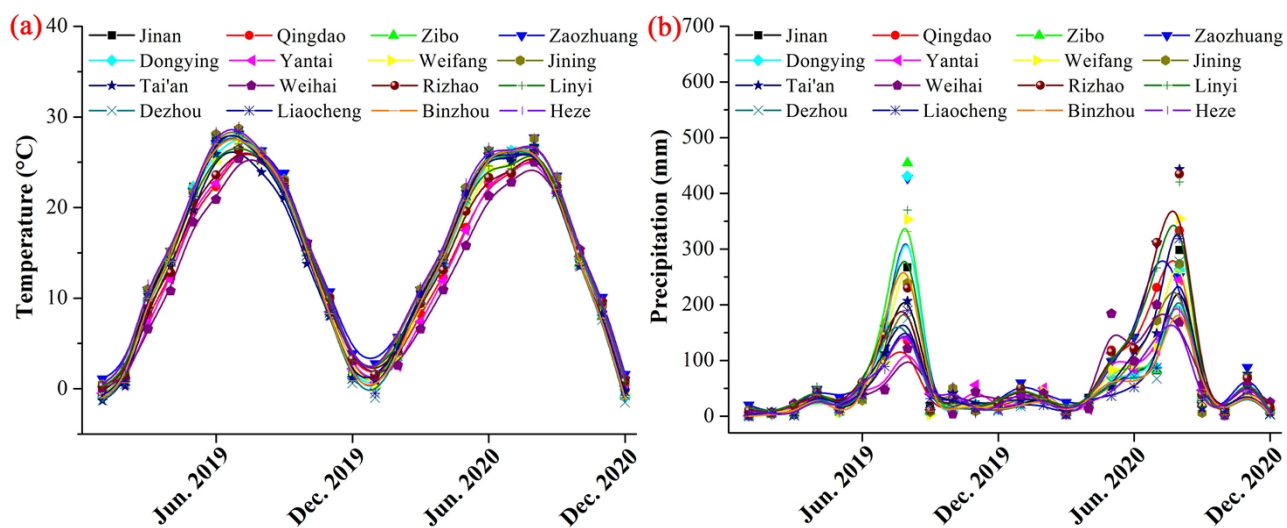

**Fig. S2** Temperature (a) and precipitation (b) conditions in Shandong Province in 2019-2020

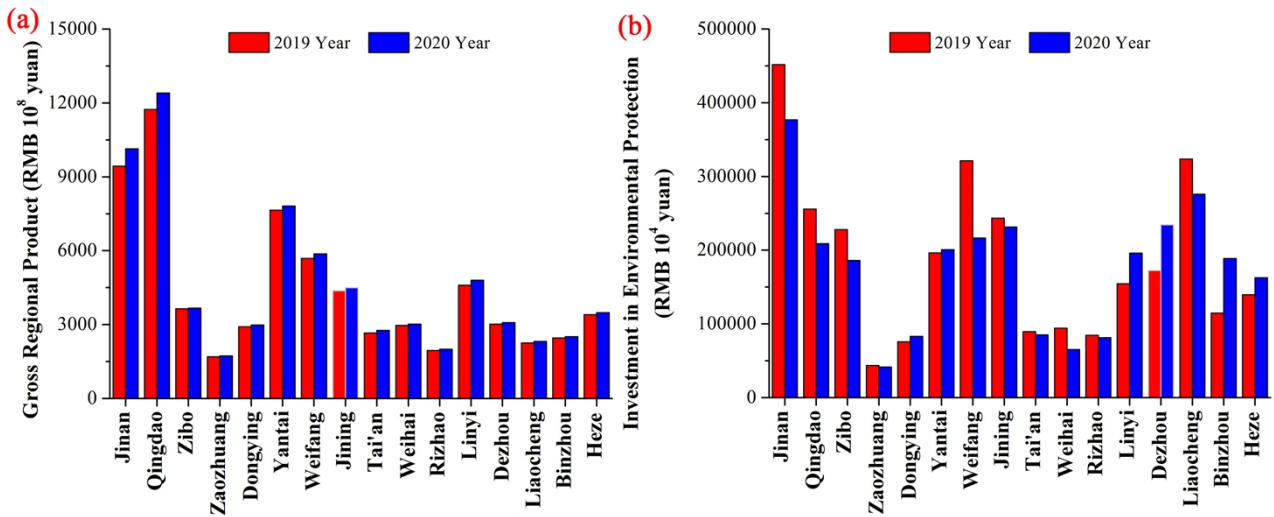

**Fig. S3** Economic status of Shandong Province from 2019-2020: GRP (a) and investment in environmental protection (b)

Fig. S3 shows the GRP and investment in environmental protection of 16 cities in Shandong Province in 2019-2020. In 2019 and 2020, Shandong's economic development was stable and improving, with the GRP of the region reaching 7.05 trillion yuan and 7.31 trillion yuan, respectively. There are large differences among cities in Shandong Province: Qingdao, Jinan and Yantai are at the forefront of the whole province. In 2019 and 2020, the regional GRP of Qingdao reached 1,174.131 billion yuan and 1,240.056 billion yuan, respectively, accounting for 17% of the whole province. The economic strength of Zaozhuang, Rizhao and Liaocheng is weak. In 2019 and 2020, the regional GRP of Zaozhuang was only 169.391 billion yuan and 173.325 billion yuan, respectively, accounting for approximately 2% of the province. In Shandong Province, investment in environmental governance varies greatly among cities. In 2019 and 2020, Jinan had the largest investment in environmental governance, reaching 4517.32 million yuan and 3768.07 million yuan, respectively, while Zaozhuang had the least investment, reaching 435.08 million yuan and 416.25 million yuan, respectively.

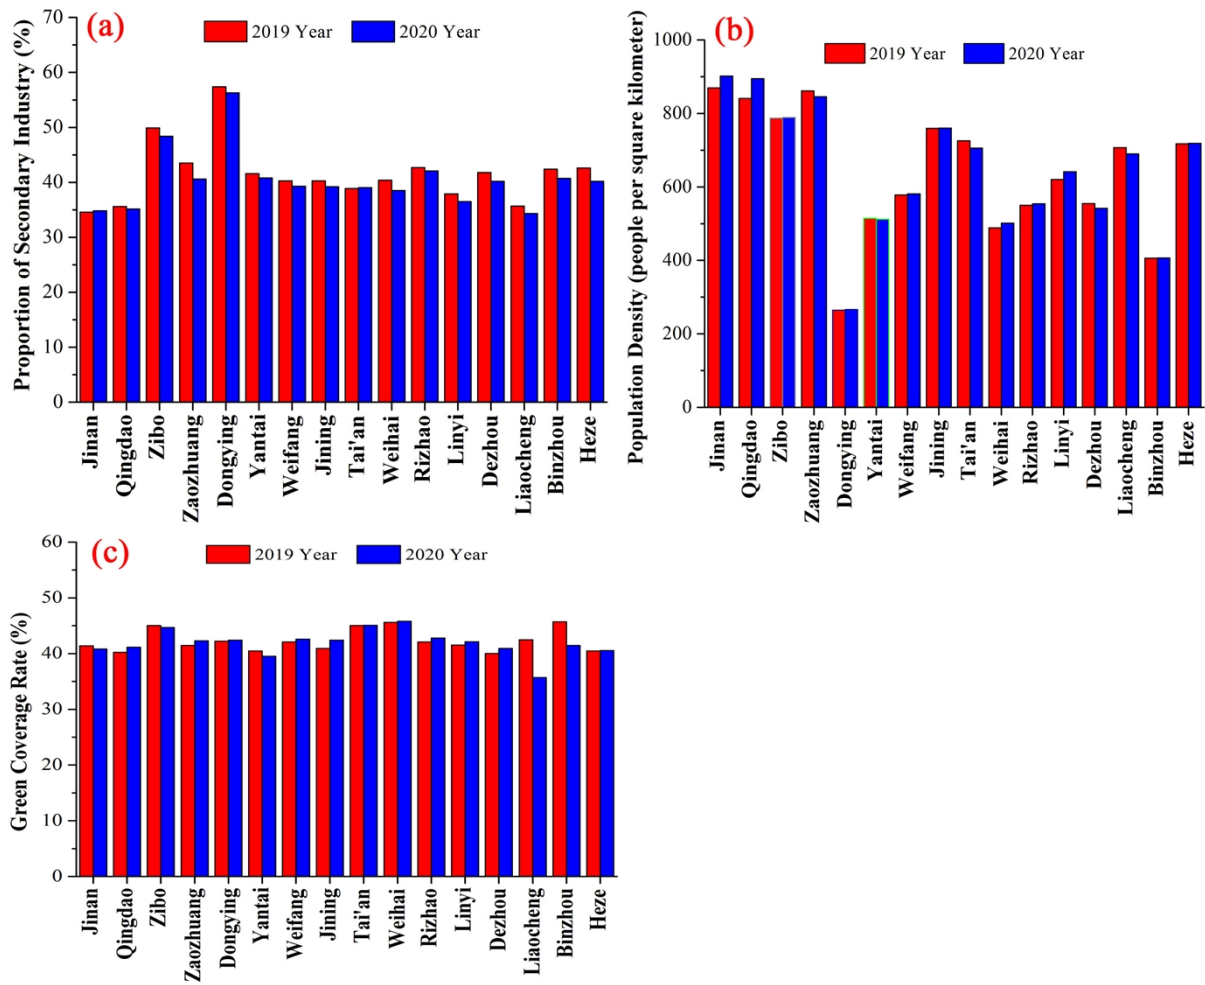

**Fig. S4** The social situation of Shandong Province in 2019 and 2020: Proportion of secondary industry (a), population density (b) and green coverage rate (c)

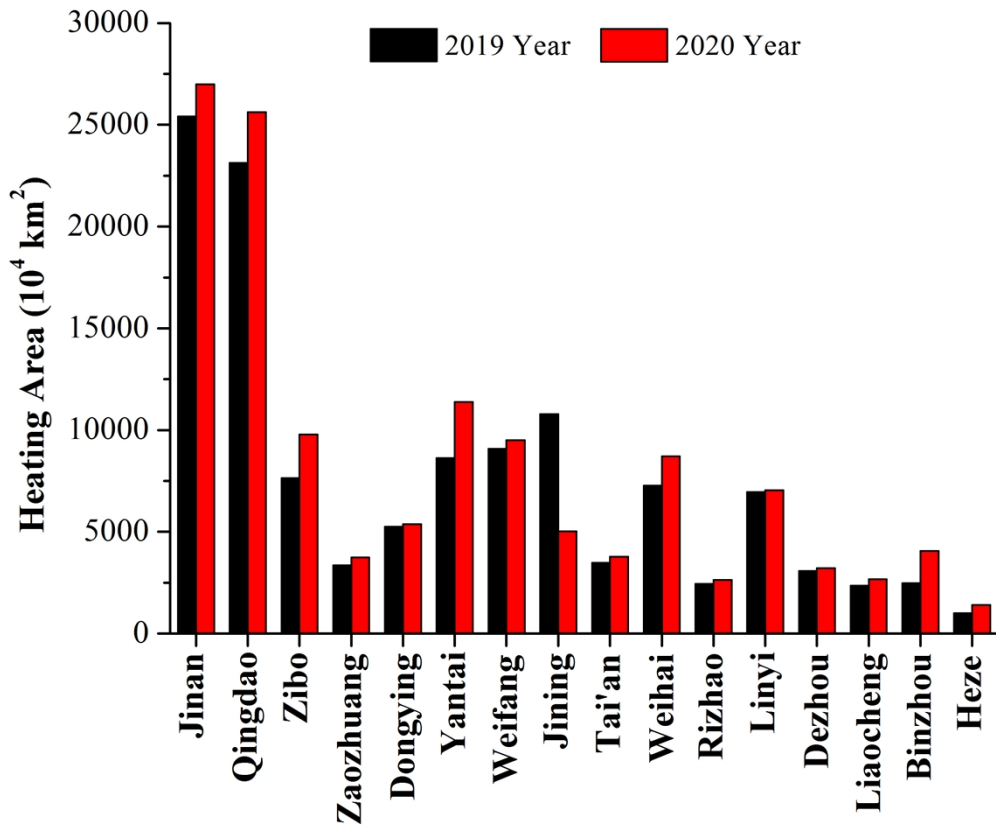

Fig. S5 The heating area of Shandong Province in 2019 and 2020

**Table S1** The individual air quality index (IAQI) and limited value of related pollutant.

| IAQI | SO <sub>2</sub> <sup>a</sup> | SO <sub>2</sub> <sup>b</sup> | NO <sub>2</sub> <sup>a</sup> | NO <sub>2</sub> <sup>b</sup> | PM10 <sup>a</sup> | CO <sup>a</sup>   | CO <sup>b</sup>   | O <sub>3</sub> <sup>b</sup> | O <sub>3</sub> <sup>c</sup> | PM2.5 <sup>a</sup> |
|------|------------------------------|------------------------------|------------------------------|------------------------------|-------------------|-------------------|-------------------|-----------------------------|-----------------------------|--------------------|
|      | µg/m <sup>3</sup>            | µg/m <sup>3</sup>            | µg/m <sup>3</sup>            | µg/m <sup>3</sup>            | µg/m <sup>3</sup> | mg/m <sup>3</sup> | mg/m <sup>3</sup> | µg/m <sup>3</sup>           | µg/m <sup>3</sup>           | µg/m <sup>3</sup>  |
| 0    | 0                            | 0                            | 0                            | 0                            | 0                 | 0                 | 0                 | 0                           | 0                           | 0                  |
| 50   | 50                           | 150                          | 40                           | 100                          | 50                | 2                 | 5                 | 160                         | 100                         | 35                 |
| 100  | 150                          | 500                          | 80                           | 200                          | 150               | 4                 | 10                | 200                         | 160                         | 75                 |
| 150  | 475                          | 650                          | 180                          | 700                          | 250               | 14                | 35                | 300                         | 215                         | 115                |
| 200  | 800                          | 800                          | 280                          | 1200                         | 350               | 24                | 60                | 400                         | 265                         | 150                |
| 300  | 1600                         | 1600                         | 565                          | 2340                         | 420               | 36                | 90                | 800                         | 800                         | 250                |
| 400  | 2100                         | 2100                         | 750                          | 3090                         | 500               | 48                | 120               | 1000                        | 1000                        | 350                |
| 500  | 2620                         | 2620                         | 940                          | 3840                         | 600               | 60                | 150               | 1200                        | 1200                        | 500                |

a: Mean concentration for 24 h.

b: Mean concentration for 1 h.

c: Mean concentration for 8 h.

**Table S2** The classification and level of AQI

| AQI     | Level   | Classification         | Color  |
|---------|---------|------------------------|--------|
| 0-50    | Level 1 | Excellent              | Green  |
| 51-100  | Level 2 | Good                   | Yellow |
| 101-150 | Level 3 | Mild Contamination     | Orange |
| 151-200 | Level 4 | Middle Level Pollution | Red    |
| 201-300 | Level 5 | Serious Contamination  | Purple |
| > 300   | Level 6 | Severe Contamination   | Maroon |



**Table S3** Pollutant concentration during January to March (lockdown period in 2020) of 2017-2023

| Pollutional Index                                       | 2017 | 2018 | 2019 | 2020 | 2021 | 2022 | 2023 |
|---------------------------------------------------------|------|------|------|------|------|------|------|
| Concentration of SO <sub>2</sub> (µg/m <sup>3</sup> )   | 38   | 23   | 20   | 13   | 15   | 12   | 13   |
| Concentration of NO <sub>2</sub> (µg/m <sup>3</sup> )   | 44   | 40   | 44   | 31   | 36   | 31   | 34   |
| Concentration of PM10 (µg/m <sup>3</sup> )              | 135  | 121  | 136  | 93   | 104  | 81   | 104  |
| Concentration of PM2.5 (µg/m <sup>3</sup> )             | 82   | 69   | 80   | 62   | 58   | 51   | 59   |
| Concentration of O <sub>3-8h</sub> (µg/m <sup>3</sup> ) | 102  | 114  | 105  | 104  | 102  | 104  | 115  |
| Concentration of CO-95per (mg/m <sup>3</sup> )          | 2.2  | 1.8  | 1.7  | 1.4  | 1.3  | 1.1  | 1.2  |

**Table S4** AQI of 16 cities in Shandong Province in 2019-2020

| City      | 2019            |                 |      |       |                |    |     | 2020            |                 |      |       |                |    |     |
|-----------|-----------------|-----------------|------|-------|----------------|----|-----|-----------------|-----------------|------|-------|----------------|----|-----|
|           | SO <sub>2</sub> | NO <sub>2</sub> | PM10 | PM2.5 | O <sub>3</sub> | CO | AQI | SO <sub>2</sub> | NO <sub>2</sub> | PM10 | PM2.5 | O <sub>3</sub> | CO | AQI |
| Jinan     | 15              | 52              | 77   | 73    | 140            | 40 | 140 | 12              | 44              | 68   | 65    | 122            | 38 | 122 |
| Qingdao   | 8               | 40              | 55   | 53    | 90             | 38 | 90  | 7               | 39              | 56   | 45    | 88             | 30 | 88  |
| Zibo      | 20              | 53              | 77   | 77    | 141            | 48 | 141 | 17              | 48              | 70   | 72    | 126            | 45 | 126 |
| Zaozhaung | 17              | 43              | 82   | 62    | 128            | 35 | 128 | 16              | 38              | 72   | 74    | 115            | 35 | 115 |
| Dongying  | 15              | 45              | 70   | 67    | 137            | 38 | 137 | 15              | 39              | 65   | 63    | 116            | 35 | 116 |
| Yantai    | 8               | 34              | 60   | 50    | 99             | 33 | 99  | 8               | 32              | 54   | 43    | 94             | 28 | 94  |
| Weifang   | 13              | 47              | 77   | 74    | 119            | 43 | 119 | 11              | 40              | 68   | 65    | 108            | 40 | 108 |
| Jining    | 17              | 45              | 69   | 74    | 127            | 38 | 127 | 14              | 42              | 65   | 70    | 121            | 40 | 121 |
| Tai'an    | 15              | 43              | 74   | 73    | 132            | 38 | 132 | 14              | 37              | 66   | 64    | 120            | 38 | 120 |
| Weihai    | 6               | 25              | 53   | 42    | 100            | 28 | 100 | 5               | 19              | 44   | 35    | 85             | 23 | 85  |
| Rizhao    | 9               | 44              | 68   | 63    | 105            | 40 | 105 | 8               | 39              | 56   | 50    | 99             | 33 | 99  |
| Linyi     | 15              | 48              | 78   | 78    | 125            | 40 | 125 | 12              | 43              | 68   | 68    | 117            | 38 | 117 |
| Dezhou    | 15              | 43              | 77   | 73    | 138            | 40 | 138 | 13              | 37              | 71   | 72    | 120            | 40 | 120 |
| Liaocheng | 14              | 48              | 81   | 79    | 141            | 43 | 141 | 12              | 42              | 72   | 73    | 113            | 40 | 113 |
| Binzhou   | 19              | 49              | 71   | 73    | 141            | 43 | 141 | 16              | 47              | 66   | 68    | 130            | 40 | 130 |
| Heze      | 14              | 42              | 80   | 78    | 125            | 35 | 125 | 11              | 38              | 75   | 73    | 110            | 35 | 110 |

**Table S5** Correlation analysis between the pollutant index and emission load of particulate matter index in 2020

| Pollutional Index                              | Total particulate matter emissions           |         | Particulate matter emissions from industrial sources |         | Particulate matter emissions from domestic sources |         |
|------------------------------------------------|----------------------------------------------|---------|------------------------------------------------------|---------|----------------------------------------------------|---------|
|                                                | Correlation                                  | P value | Correlation                                          | P value | Correlation                                        | P value |
|                                                | Annual mean concentration of SO <sub>2</sub> | 0.036   | 0.896                                                | -0.158  | 0.558                                              | -0.028  |
| Annual mean concentration of NO <sub>2</sub>   | 0.401                                        | 0.124   | 0.037                                                | 0.892   | 0.341                                              | 0.196   |
| Annual mean concentration of PM <sub>10</sub>  | -0.049                                       | 0.858   | 0.038                                                | 0.888   | -0.161                                             | 0.553   |
| Annual mean concentration of PM <sub>2.5</sub> | -0.058                                       | 0.832   | -0.091                                               | 0.736   | -0.093                                             | 0.732   |
| Annual mean concentration of O <sub>3-8h</sub> | 0.338                                        | 0.2     | 0.071                                                | 0.795   | 0.232                                              | 0.387   |
| Annual mean concentration of CO-95per          | 0.303                                        | 0.253   | -0.027                                               | 0.921   | 0.306                                              | 0.248   |
| PDHP                                           | -0.033                                       | 0.904   | -0.049                                               | 0.857   | -0.137                                             | 0.614   |
| PDWP                                           | -0.362                                       | 0.168   | -0.106                                               | 0.695   | -0.301                                             | 0.257   |

**Table S6** Correlation analysis between the pollutant index and emission load of particulate matter index in heating period in 2019-2020

| Pollutional Index                       | Total particulate matter emissions |         | Particulate matter emissions from industrial sources |         | Particulate matter emissions from domestic sources |         |
|-----------------------------------------|------------------------------------|---------|------------------------------------------------------|---------|----------------------------------------------------|---------|
|                                         | Correlation                        | P value | Correlation                                          | P value | Correlation                                        | P value |
| Mean concentration of SO <sub>2</sub>   | 0.085                              | 0.648   | 0.106                                                | 0.569   | -0.086                                             | 0.647   |
| Mean concentration of NO <sub>2</sub>   | 0.369                              | 0.041** | 0.369                                                | 0.041** | 0.102                                              | 0.585   |
| Mean concentration of PM10              | 0.158                              | 0.397   | 0.306                                                | 0.094*  | -0.137                                             | 0.462   |
| Mean concentration of PM2.5             | 0.196                              | 0.292   | 0.296                                                | 0.106   | -0.078                                             | 0.675   |
| Mean concentration of O <sub>3-8h</sub> | 0.1                                | 0.593   | 0.186                                                | 0.316   | -0.108                                             | 0.563   |
| Mean concentration of CO-95per          | 0.269                              | 0.143   | 0.222                                                | 0.230   | 0.118                                              | 0.528   |
| PDHP                                    | -0.244                             | 0.186   | -0.197                                               | 0.287   | -0.103                                             | 0.582   |
| PDWP                                    | -0.327                             | 0.073*  | -0.347                                               | 0.056*  | -0.088                                             | 0.638   |

\* P < 0.05; \*\* P < 0.01

**Table S7** Correlation analysis between the pollutant index and economic index in 2019-2020

| Pollutional Index                              | GRP         |         | Investment in environmental protection |         |
|------------------------------------------------|-------------|---------|----------------------------------------|---------|
|                                                | Correlation | P value | Correlation                            | P value |
| Annual mean concentration of SO <sub>2</sub>   | -0.338      | 0.063*  | -0.118                                 | 0.527   |
| Annual mean concentration of NO <sub>2</sub>   | -0.092      | 0.623   | 0.248                                  | 0.178   |
| Annual mean concentration of PM10              | -0.271      | 0.140   | 0.081                                  | 0.666   |
| Annual mean concentration of PM2.5             | -0.268      | 0.145   | 0.132                                  | 0.480   |
| Annual mean concentration of O <sub>3-8h</sub> | -0.312      | 0.087*  | 0.051                                  | 0.787   |
| Annual mean concentration of CO-95per          | -0.064      | 0.732   | 0.438                                  | 0.014** |
| PDHP                                           | -0.032      | 0.863   | 0.041                                  | 0.828   |
| PDWP                                           | -0.109      | 0.560   | -0.045                                 | 0.812   |

\* P < 0.05; \*\* P < 0.01

Based on the correlation analysis between pollutant indicators and economic indicators of 16 cities in Shandong Province, as shown in Table S7, there were significant negative correlation between SO<sub>2</sub> and GRP, O<sub>3-8h</sub> and GRP, respectively. Nevertheless, there was significant positive correlation between CO-95per and investment in environmental protection. The results indicated that the economic level was played key role in improvement of SO<sub>2</sub>, O<sub>3</sub> and CO. In addition, Shandong's economic structure is dominated by the tertiary industry, whose production value in 2019 and 2020 accounted for 52.8% and 53.5%, respectively. Since 2018, Shandong has promoted the transformation of old and new driving forces, changing the industrial status quo of a high proportion of traditional industries, "heavy" economic structure and high consumption of energy and resources. With digital empowerment, innovation-driven and intelligent manufacturing as the core elements of Shandong's industrial transformation momentum and competitive strength, the transformation of industrial structure can make Shandong achieve a "win-win" situation in both economic development and environmental protection.

**Table S8** Correlation analysis between the pollutant index and social situation in 2019 and 2020

| Pollutional Index                              | Proportion of secondary industry in 2019 |         | Proportion of secondary industry in 2020 |         | Population density in 2019 |         | Population density in 2020 |         | Green coverage rate in 2019 |         | Green coverage rate in 2020 |         |
|------------------------------------------------|------------------------------------------|---------|------------------------------------------|---------|----------------------------|---------|----------------------------|---------|-----------------------------|---------|-----------------------------|---------|
|                                                | Correlation                              | P value | Correlation                              | P value | Correlation                | P value | Correlation                | P value | Correlation                 | P value | Correlation                 | P value |
| Annual mean concentration of SO <sub>2</sub>   | 0.309                                    | 0.244   | 0.378                                    | 0.149   | 0.346                      | 0.19    | 0.438                      | 0.09    | 0.202                       | 0.454   | 0.138                       | 0.609   |
| Annual mean concentration of NO <sub>2</sub>   | -0.048                                   | 0.86    | -0.065                                   | 0.811   | 0.072                      | 0.79    | 0.135                      | 0.619   | 0.376                       | 0.151   | -0.067                      | 0.804   |
| Annual mean concentration of PM10              | 0.069                                    | 0.801   | -0.094                                   | 0.728   | -0.108                     | 0.692   | -0.124                     | 0.648   | -0.049                      | 0.858   | -0.335                      | 0.205   |
| Annual mean concentration of PM2.5             | 0.036                                    | 0.896   | -0.016                                   | 0.952   | -0.117                     | 0.666   | -0.052                     | 0.849   | -0.019                      | 0.946   | -0.313                      | 0.238   |
| Annual mean concentration of O <sub>3-8h</sub> | 0.143                                    | 0.597   | 0.113                                    | 0.676   | 0.276                      | 0.301   | 0.274                      | 0.305   | 0.382                       | 0.144   | 0.032                       | 0.905   |
| Annual mean concentration of CO-95per          | -0.079                                   | 0.772   | -0.017                                   | 0.952   | 0.003                      | 0.991   | 0.048                      | 0.86    | 0.314                       | 0.236   | -0.008                      | 0.978   |
| PDHP                                           | 0.24                                     | 0.37    | 0.008                                    | 0.976   | -0.142                     | 0.6     | -0.08                      | 0.768   | 0.138                       | 0.609   | -0.27                       | 0.311   |
| PDWP                                           | -0.119                                   | 0.66    | 0.12                                     | 0.657   | 0.004                      | 0.987   | -0.037                     | 0.892   | 0.116                       | 0.669   | 0.325                       | 0.325   |
